# Supplementary material
Source: MDPI journal article supplement (https://www.mdpi.com/2073-4433/15/2/232)
Supplement: s1 [file s1]

Supplementary

# Causes of Summer Ozone Pollution Events in Jinan, East China: Local Photochemical Formation or Regional Transport?

Baolin Wang <sup>1</sup>, Yuchun Sun <sup>1</sup>, Lei Sun <sup>1</sup>, Zhenguo Liu <sup>1</sup>, Chen Wang <sup>1,\*</sup>, Rui Zhang <sup>1</sup>, Chuanyong Zhu <sup>1</sup>, Na Yang <sup>1</sup>, Guolan Fan <sup>2</sup>, Xiaoyan Sun <sup>2</sup>, Zhiyong Xia <sup>2</sup>, Hongyu Xu <sup>2</sup>, Guang Pan <sup>2</sup>, Zhanchao Zhang <sup>2</sup>, Guihuan Yan <sup>3</sup> and Chongqing Xu <sup>1,3</sup>

<sup>1</sup> School of Environmental Science and Engineering, Qilu University of Technology (Shandong Academy of Sciences), Jinan 250353, China; wangbaolin@qlu.edu.cn (B.W.); 10431211232@stu.qlu.edu.cn (Y.S.); sun-lei@qlu.edu.cn (L.S.); 10431211228@stu.qlu.edu.cn (Z.L.); 202193070043@stu.qlu.edu.cn (R.Z.); zchy@qlu.edu.cn (C.Z.); yangna@qlu.edu.cn (N.Y.); xucq@sderi.cn (C.X.)

<sup>2</sup> Jinan Eco-Environmental Monitoring Center of Shandong Province, Jinan 250101, China; jnhbjfan-guolan@jn.shandong.cn (G.F.); jnhbjsunxiaoyan@jn.shandong.cn (X.S.); jnhbjxiazhiyong@jn.shandong.cn (Z.X.); jnhbjxuhongyu@jn.shandong.cn (H.X.); panguang@shandong.cn (G.P.); zhangzhanchao@jn.gov.cn (Z.Z.)

<sup>3</sup> Ecology Institute of Shandong Academy of Sciences, Qilu University of Technology (Shandong Academy of Sciences), Jinan 250103, China; yanguihuan@qlu.edu.cn

\* Correspondence: wangchen@qlu.edu.cn

This supporting information section contains: **2 pages, 1 Figure.**

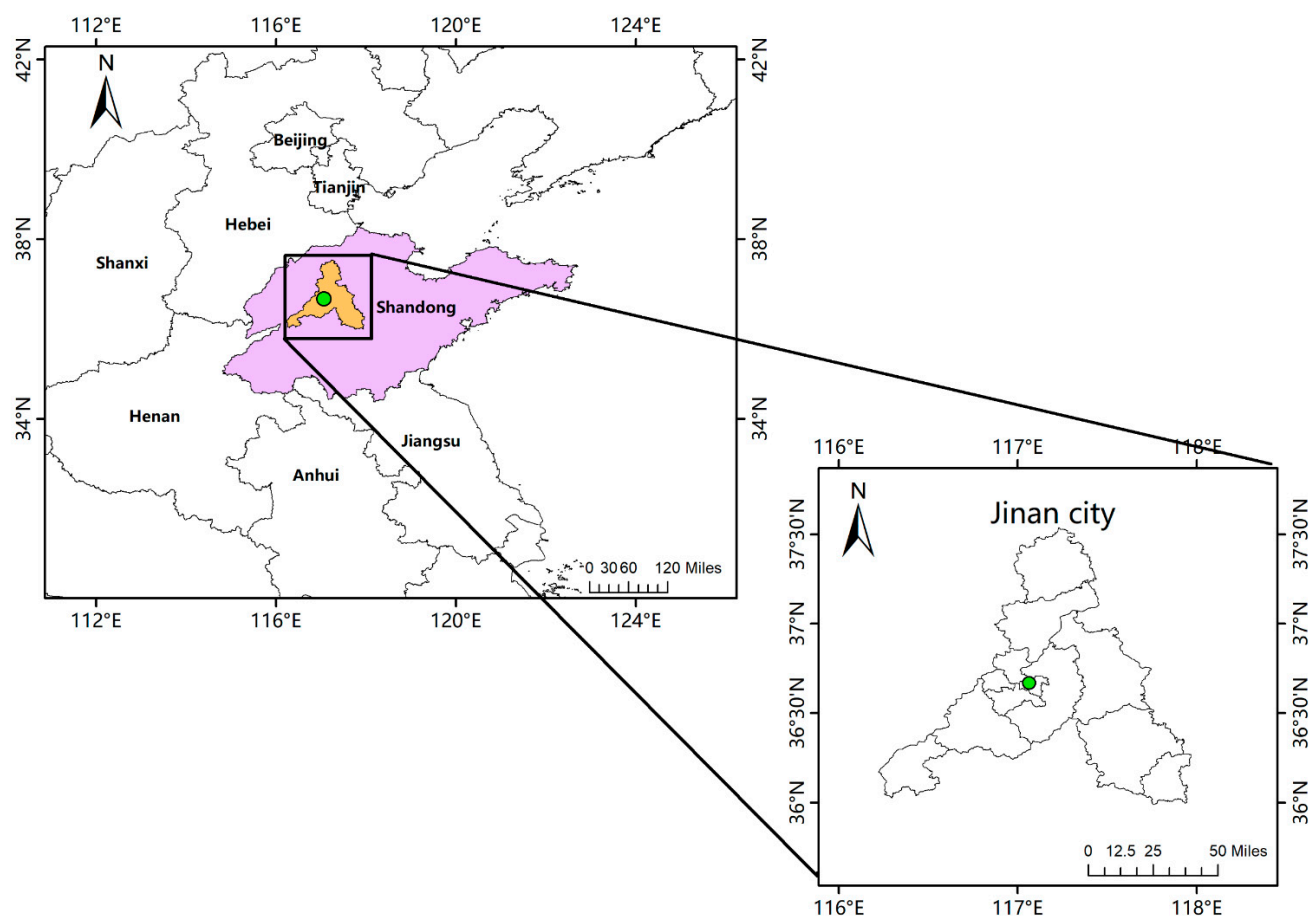

**Figure S1.** Location of the sampling site in this study.
